# Supplementary material for: Glucocorticoid receptor repression mediated by BRCA1 inactivation in ovarian cancer
Source: PubMed Central journal article supplement (PMC4004164; doi:10.1186/1471-2407-14-188), 2014-03-14
Supplement: 1471-2407-14-188-S1.pdf [file 1471-2407-14-188-S1.pdf]

**Table S1 Clinical characteristics for the 28 BRCA1-mutated serous ovarian cancer patients**

| Case | Age | Stage <sup>a</sup> | Grade <sup>b</sup> | Gene  | Exon | Mutation        | AA change    | Mutation type <sup>c</sup> |
|------|-----|--------------------|--------------------|-------|------|-----------------|--------------|----------------------------|
| 1    | 70  | IIIC               | PD                 | BRCA1 | 11   | c.2331 T > A    | p.Y777X      | NS                         |
| 2    | 47  | IIIC               | MD                 | BRCA1 | 11   | c.2311 T > G    | p.L771V      | MS                         |
| 3    | 54  | IIIC               | PD                 | BRCA1 | 11   | c.2566 T > C    | p.Y856H      | MS                         |
| 4    | 68  | IIIC               | MD                 | BRCA1 | 11   | c.2612 C > T    | p.P871L      | MS                         |
| 5    | 64  | IIIC               | MD                 | BRCA1 | 11   | c.2612 C > T    | p.P871L      | MS                         |
| 6    | 57  | IA                 | PD                 | BRCA1 | 11   | c.2566 T > C    | p.Y856H      | MS                         |
| 7    | 63  | IIIC               | PD                 | BRCA1 | 11   | c.2612 C > T    | p.P871L      | MS                         |
| 8    | 56  | IIIC               | PD                 | BRCA1 | 11   | c.2709 T > A    | p.C903X      | NS                         |
| 9    | 49  | IIB                | PD                 | BRCA1 | 11   | c.3710 C > T    | p.A1237V     | MS                         |
| 10   | 52  | IIB                | MD                 | BRCA1 | 11   | c.3109 C > T    | p.Q1037X     | NS                         |
| 11   | 58  | IIIC               | PD                 | BRCA1 | 11   | c.2212 G > A    | p.V738I      | MS                         |
| 12   | 61  | IIIC               | PD                 | BRCA1 | 11   | c.2312 T > C    | p.L771S      | MS                         |
| 13   | 53  | IIIC               | PD                 | BRCA1 | 11   | c.2363 T > C    | p.V788A      | MS                         |
| 14   | 57  | IIIC               | PD                 | BRCA1 | 11   | c.2429 A > G    | p.N810S      | MS                         |
| 15   | 66  | IIIC               | MD                 | BRCA1 | 11   | c.2741 A > G    | p.E914G      | MS                         |
| 16   | 58  | IIB                | MD                 | BRCA1 | 8    | c.470-471delCT  | p.S157X      | NS                         |
| 17   | 70  | IA                 | MD                 | BRCA1 | 8    | c.491 C > T     | p.T164I      | MS                         |
| 18   | 48  | IIIC               | PD                 | BRCA1 | 2    | c.63 C > G      | p.I21M       | MS                         |
| 19   | 51  | IA                 | PD                 | BRCA1 | 11   | c.1010delA      | p.K339RfsX2  | FS                         |
| 20   | 50  | IIB                | MD                 | BRCA1 | 3    | c.127 T > A     | p.F43I       | MS                         |
| 21   | 62  | IIIC               | PD                 | BRCA1 | 11   | c.4046_4047insG | p.E1352GfsX4 | FS                         |
| 22   | 49  | IIIC               | PD                 | BRCA1 | 14   | c.4372 C > T    | p.Q1458X     | NS                         |
| 23   | 55  | IIIC               | MD                 | BRCA1 | 14   | c.4454 C > T    | p.T1485I     | MS                         |
| 24   | 64  | IIB                | PD                 | BRCA1 | 24   | c.5666 G > C    | p.G1889A     | MS                         |
| 25   | 52  | IIB                | PD                 | BRCA1 | 24   | c.5906 T > C    | p.F1969S     | MS                         |
| 26   | 68  | IIIC               | PD                 | BRCA1 | 24   | c.6489 T > A    | p.F2163L     | MS                         |
| 27   | 61  | IIIC               | MD                 | BRCA1 | 24   | c.6677C > G     | p.S2226X     | NS                         |
| 28   | 58  | IIB                | PD                 | BRCA1 | 24   | c.6856 G > T    | p.D2286Y     | MS                         |

**Table S2 Clinical characteristics for the 23 BRCA2-mutated serous ovarian cancer patients**

| Case | Age | Stage <sup>a</sup> | Grade <sup>b</sup> | Gene  | Exon | Mutation         | AA change    | Mutation type <sup>c</sup> |
|------|-----|--------------------|--------------------|-------|------|------------------|--------------|----------------------------|
| 1    | 51  | IIIC               | PD                 | BRCA2 | 3    | c.147 A > T      | p.E49D       | MS                         |
| 2    | 58  | IIB                | PD                 | BRCA2 | 4    | c.380 C > T      | p.A127V      | MS                         |
| 3    | 69  | IIIC               | PD                 | BRCA2 | 11   | c.3109 C > T     | p.Q1037X     | NS                         |
| 4    | 48  | IIIC               | MD                 | BRCA2 | 10   | c.945 T > A      | p.C315X      | NS                         |
| 5    | 56  | IA                 | MD                 | BRCA2 | 10   | c.1022 G > C     | p.C341S      | MS                         |
| 6    | 63  | IIB                | PD                 | BRCA2 | 10   | c.1062 del T     | p.F354LfsX4  | FS                         |
| 7    | 70  | IIIC               | PD                 | BRCA2 | 10   | c.1169C > T      | p.S390F      | MS                         |
| 8    | 62  | IIIC               | PD                 | BRCA2 | 10   | c.1261C > T      | p.Q421X      | NS                         |
| 9    | 55  | IIB                | MD                 | BRCA2 | 10   | c.1652 A > T     | p.D551V      | MS                         |
| 10   | 49  | IIIC               | PD                 | BRCA2 | 11   | c.3109 C > T     | p.Q1037X     | NS                         |
| 11   | 68  | IIIC               | PD                 | BRCA2 | 10   | c.1062 del T     | p.F354LfsX4  | FS                         |
| 12   | 65  | IIIC               | PD                 | BRCA2 | 11   | c.5164-5165delAG | p.S1722YfsX4 | FS                         |
| 13   | 59  | IIIC               | MD                 | BRCA2 | 11   | c.2981 C > T     | p.A994V      | MS                         |
| 14   | 66  | IIB                | PD                 | BRCA2 | 11   | c.3410 T > A     | p.L1137X     | NS                         |
| 15   | 54  | IIIC               | PD                 | BRCA2 | 11   | c.2981 C > T     | p.A994V      | MS                         |
| 16   | 51  | IA                 | MD                 | BRCA2 | 11   | c.3710 C > T     | p.A1237V     | MS                         |
| 17   | 49  | IIIC               | PD                 | BRCA2 | 11   | c.5722-5723delCT | p.L1908RfsX2 | FS                         |
| 18   | 50  | IIIC               | MD                 | BRCA2 | 11   | c.3710 C > T     | p.A1237V     | MS                         |
| 19   | 67  | IIB                | PD                 | BRCA2 | 11   | c.6539 T > A     | p.L2180X     | NS                         |
| 20   | 62  | IIIC               | PD                 | BRCA2 | 11   | c.3109 C > T     | p.Q1037X     | NS                         |
| 21   | 58  | IIIC               | PD                 | BRCA2 | 24   | c.10115 C > A    | p.A3372D     | MS                         |
| 22   | 70  | IIIC               | MD                 | BRCA2 | 24   | c.10373 G > C    | p.S3458T     | MS                         |
| 23   | 55  | IIB                | PD                 | BRCA2 | 24   | c.10739 A > C    | p.N3580T     | MS                         |

a: The tumor stages were assessed according to the International Federation of Gynecology and Obstetrics.

b: PD: poorly differentiated; MD: moderately differentiated.

c: NS: nonsense mutation; MS: missense mutation ; FS: frame-shift.
