# Supplementary material for: Glucocorticoid receptor repression mediated by BRCA1 inactivation in ovarian cancer
Source: PubMed Central journal article supplement (PMC4004164; doi:10.1186/1471-2407-14-188), 2014-03-14
Supplement: 1471-2407-14-188-S4.pdf [file 1471-2407-14-188-S4.pdf]

## Additional file 4 - GR expression patterns in non-mutated and BRCA2-mutated ovarian cancer

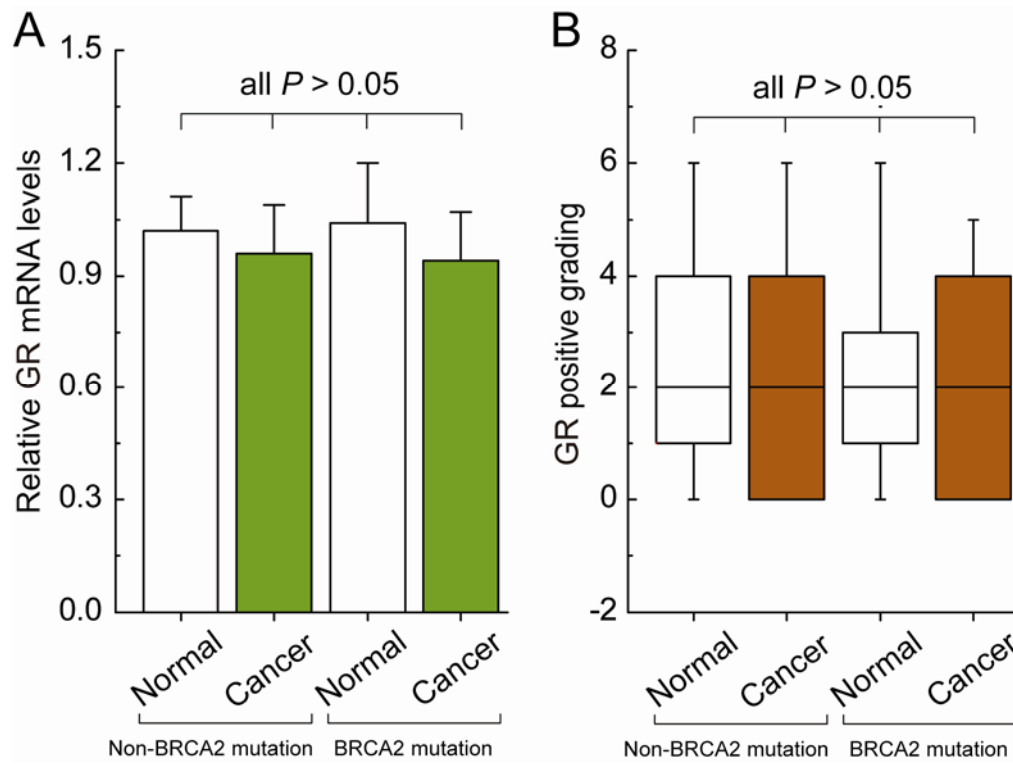

A, relative GR mRNA levels were measured in 23 pairs of non-mutated and BRCA2-mutated ovarian cancer, and their adjacent normal tissue. Bar graphs show mean  $\pm$ SD. B, GR protein levels assessed by immunohistochemistry in 23 pairs of non-mutated and BRCA2-mutated ovarian cancer, and their adjacent normal tissue. The intensity of staining was divided into 10 units.
